# Supplementary material
Source: Springer Nature journal article supplement (https://www.springermedizin.de/resource/supplementary/12958_2007_386_MOESM7_ESM.pdf/9567770)

40 Days

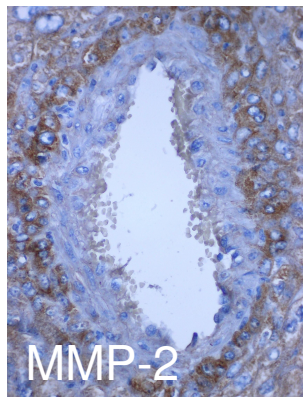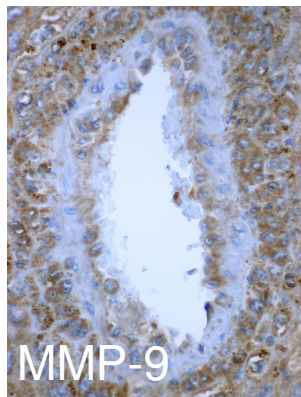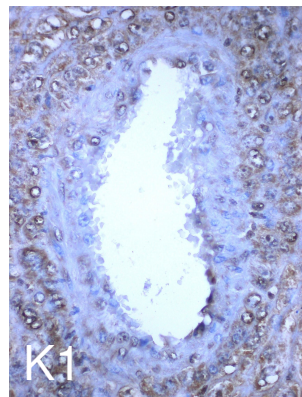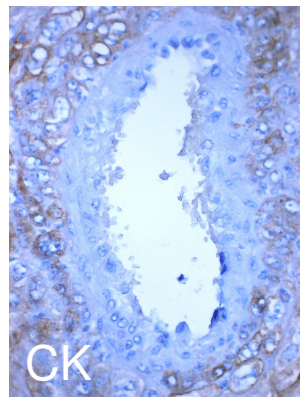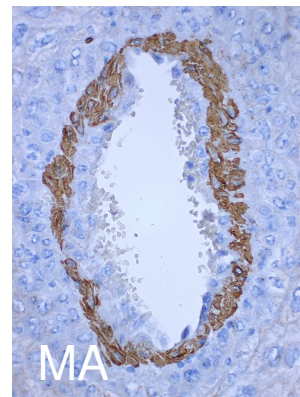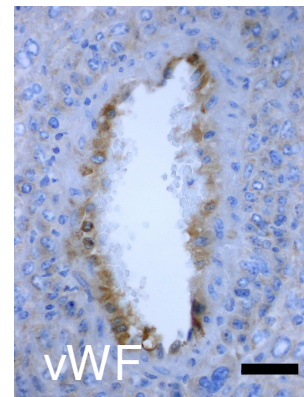

60 Days

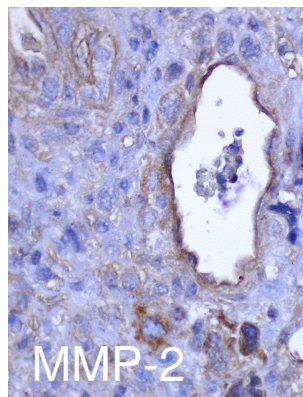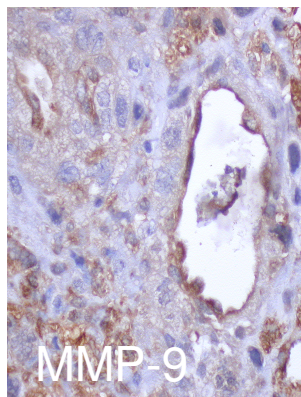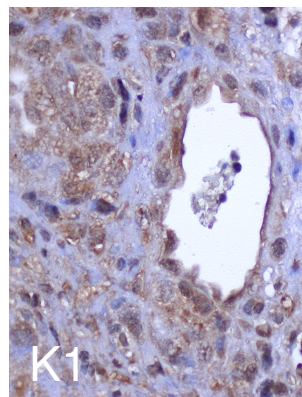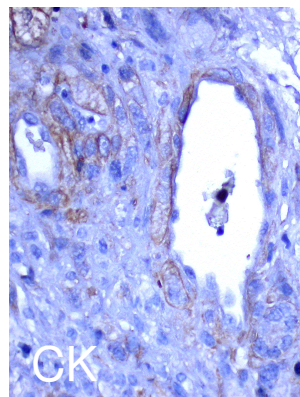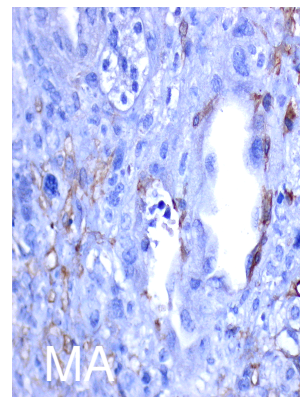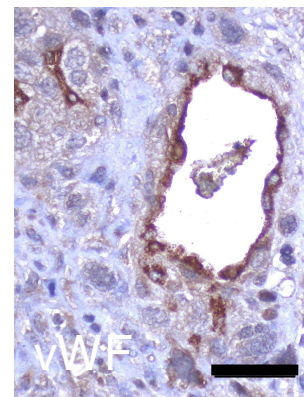

Supplement: MOESM7 [file 9567770]
